# Supplementary material for: Mouse dead end1 acts with Nanos2 and Nanos3 to regulate testicular teratoma incidence
Source: PubMed Central journal article supplement (PMC7185693; doi:10.1371/journal.pone.0232047), 2020-04-27

Figure S4. Imai A, et al.

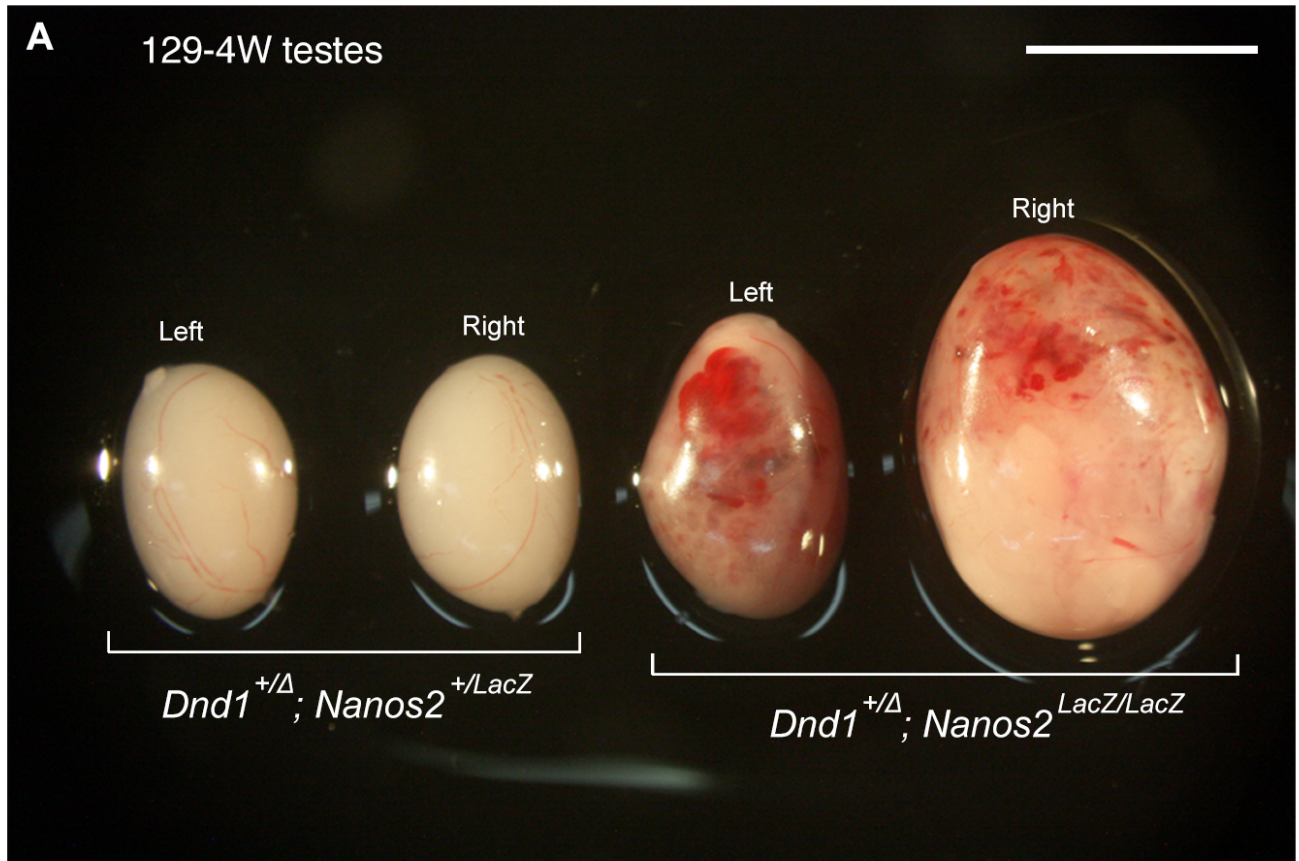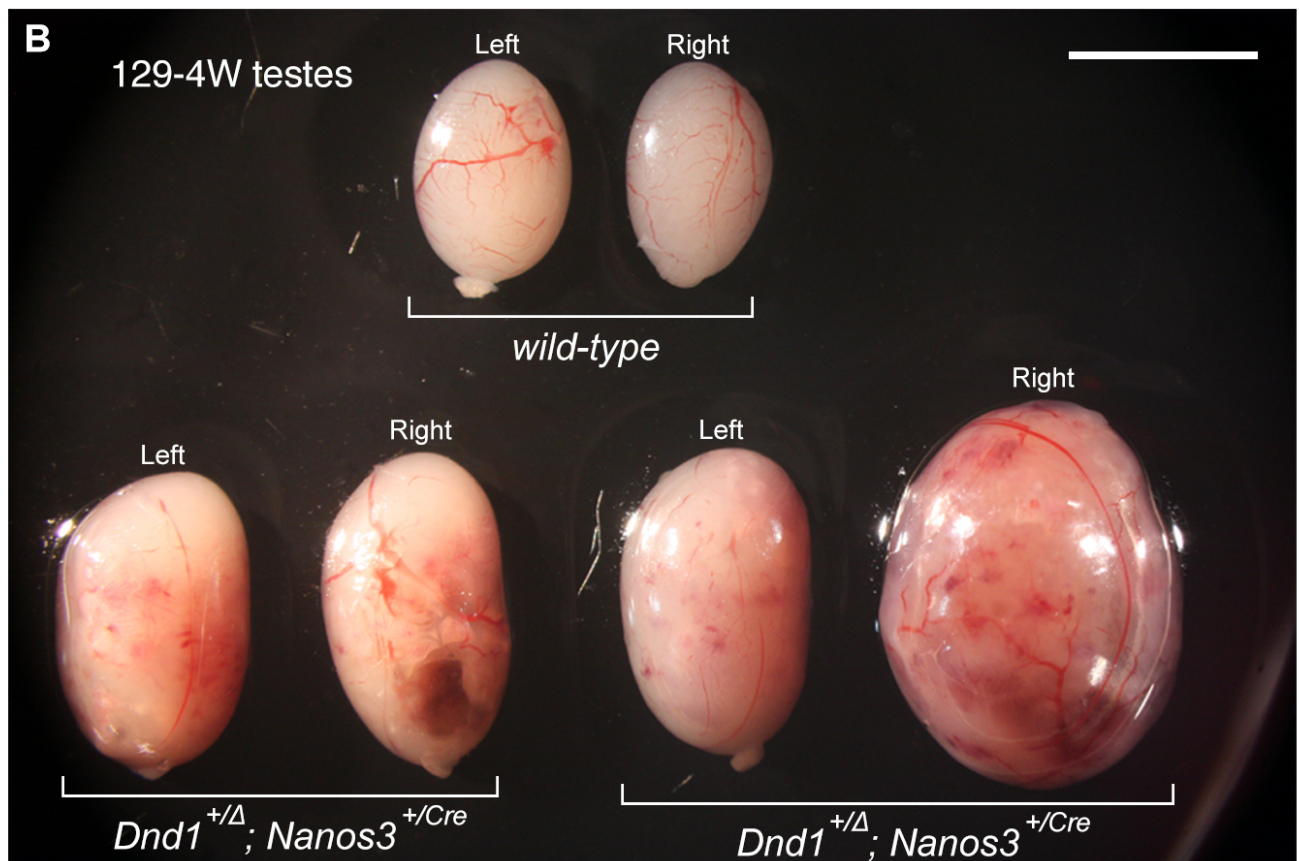

Supplement: pone.0232047.s004.pdf [file pone.0232047.s004.pdf]
