# Supplementary material for: Mouse dead end1 acts with Nanos2 and Nanos3 to regulate testicular teratoma incidence
Source: PubMed Central journal article supplement (PMC7185693; doi:10.1371/journal.pone.0232047), 2020-04-27
Supplement: pone.0232047.s005.pdf [file pone.0232047.s005.pdf]

Figure S5. Imai A, et al.

|    | gene                 | location on Ch. 18     | knockout (KO) mouse line                                    | phenotype in KO mouse                                                           |
|----|----------------------|------------------------|-------------------------------------------------------------|---------------------------------------------------------------------------------|
| 1  | <i>Vaultrc5</i>      | 36,801,763..36,802,107 | not reported                                                |                                                                                 |
| 2  | <i>Zmat2</i>         | 36,793,923..36,799,660 | not reported                                                |                                                                                 |
| 3  | <i>Hars2</i>         | 36,783,202..36,792,562 | generated by IMPC                                           | Phenotyping has not been finished                                               |
| 4  | <i>Hars</i>          | 36,766,528..36,783,205 | not reported                                                |                                                                                 |
| 5  | <i>Dnd1</i>          | 36,763,671..36,766,214 |                                                             |                                                                                 |
| 6  | <i>Wdr55</i>         | 36,760,222..36,763,708 | Yougren KK, et al. <i>Nature</i> . 2005                     | Embryonic lethal                                                                |
| 7  | <i>Ik</i>            | 36,744,656..36,757,639 | generated by IMPC                                           | Embryonic lethal , Prewaning lethal                                             |
| 8  | <i>Ndufa2</i>        | 36,742,332..36,744,587 | not reported                                                |                                                                                 |
| 9  | <i>Tmco6</i>         | 36,735,019..36,742,400 | generated by IMPC                                           | Prewaning lethal, Increased or absent threshold for auditory brainstem response |
| 10 | <i>Cd14</i>          | 36,725,064..36,726,815 | Haziot A, et al. <i>Immunity</i> . 1996                     | Resistant to septic shock                                                       |
| 11 | <i>Gm41699</i>       | 36,709,020..36,718,962 | not reported                                                |                                                                                 |
| 12 | <i>E230025N22Rik</i> | 36,684,923..36,696,091 | not reported                                                |                                                                                 |
| 13 | <i>Slc35a4</i>       | 36,679,215..36,683,862 | not reported                                                |                                                                                 |
| 14 | <i>Apbb3</i>         | 36,671,154..36,679,366 | generated by IMPC                                           | No significant phenotypes reported                                              |
| 15 | <i>Sra1</i>          | 36,667,187..36,670,311 | Liu S, et al. <i>Journal of Biological Chemistry</i> . 2014 | Resistant to high fat diet obesity                                              |
| 16 | <i>Eif4ebp3</i>      | 36,664,060..36,666,324 | generated by IMPC                                           | Increased vertical activity , Decreased monocyte cell number                    |
